# Supplementary material for: Conformational coupling of the sialic acid TRAP transporter HiSiaQM with its substrate binding protein HiSiaP
Source: PubMed Central journal article supplement (PMC10774421; doi:10.1038/s41467-023-44327-3), 2024-01-08
Supplement: 41467_2023_44327_MOESM1_ESM.pdf [file 41467_2023_44327_MOESM1_ESM.pdf]

**Supplementary information for**  
**Conformational coupling of the sialic acid TRAP transporter HiSiaQM with**  
**its substrate binding protein HiSiaP**

Martin F. Peter<sup>1,2#</sup>, Jan A. Ruland<sup>3,#</sup>, Yeojin Kim<sup>1,#</sup>, Philipp Hendricks<sup>1,#</sup>, Niels Schneberger<sup>1</sup>,  
Jan Peter Siebrasse<sup>3</sup>, Gavin H. Thomas<sup>4</sup>, Ulrich Kubitscheck<sup>3</sup>, Gregor Hagelueken<sup>1,\*</sup>

<sup>1</sup> Institute of Structural Biology, University of Bonn, Venusberg-Campus 1, 53127 Bonn,  
Germany

<sup>2</sup> Present address: Biochemistry Center, Heidelberg University, Im Neuenheimer Feld 328,  
69120 Heidelberg, Germany

<sup>3</sup> Clausius Institute for Physical und Theoretical Chemistry, University of Bonn, Wegelerstr.  
12, 53127 Bonn, Germany

<sup>4</sup> Department of Biology (Area 10), University of York, York YO10 5YW, United Kingdom

#equal contribution

\*Corresponding author email: [hagelueken@uni-bonn.de](mailto:hagelueken@uni-bonn.de)

**Supplementary Table 1 | Details of the engineered disulfide bridges**

| <b>Construct</b>                             | <b>C<sub>β</sub> distance (Å)</b> | <b>Based on model</b>      |
|----------------------------------------------|-----------------------------------|----------------------------|
| CLOSED #1 (HiSiaP S44C-S171C)                | 4.8                               | 3B50 <sup>6</sup>          |
| CLOSED #2 (HiSiaP S15C-A194C)                | 4.0                               | 3B50 <sup>6</sup>          |
| IFS #1 (HiSiaQM <sub>ΔCys</sub> A492C-Q539C) | 5.9                               | 7QE5 <sup>14</sup>         |
| IFS #2 (HiSiaQM <sub>ΔCys</sub> M297C-M259C) | 4.8                               | 7QE5 <sup>14</sup>         |
| OFS #1 (HiSiaQM <sub>ΔCys</sub> A492C-L512C) | 6.1                               | Model of OFS <sup>14</sup> |
| OFS #2 (HiSiaQM <sub>ΔCys</sub> M297C-Y252C) | 5.0                               | Model of OFS <sup>14</sup> |

**Supplementary Table 2 | Data collection and refinement statistics**

|                                    |                        |
|------------------------------------|------------------------|
| PDB-ID                             | 8CP7                   |
| Space group                        | I222                   |
| Unit Cell dimensions (Å)           |                        |
| a, b, c                            | 84.08, 89.45, 90.5     |
| $\alpha$ , $\beta$ , $\gamma$      | 90, 90, 90,            |
| Resolution (Å)                     | 42.04 - 1.9 (1.97-1.9) |
| Wilson B-factor (Å <sup>2</sup> )  | 33.96                  |
| R <sub>merge</sub>                 | 0.02891 (0.6132)       |
| CC <sub>1/2</sub>                  | 1.0 (0.721)            |
| I/ $\sigma$ (I)                    | 14.84 (1.14)           |
| Completeness                       | 99.02 (99.43)          |
| Redundancy                         | 2.0(2.0)               |
| Unique reflections                 | 26990(2437)            |
| R <sub>work</sub>                  | 0.2105 (0.3441)        |
| R <sub>free</sub>                  | 0.2589 (0.3640)        |
| Average B factor (Å <sup>2</sup> ) | 39.37                  |
| Protein                            | 39.47                  |
| Ligands                            | 31.99                  |
| Solvent                            | 38.66                  |
| Non-hydrogen atoms                 | 2635                   |
| Protein                            | 2478                   |
| Ligands                            | 23                     |
| solvent                            | 134                    |
| RMS (bonds) (Å)                    | 0.010                  |
| RMS (angles) (°)                   | 1.01                   |
| Ramachandran (%)                   |                        |
| favoured                           | 99.35                  |
| allowed                            | 0.65                   |
| outliers                           | 0.00                   |
| Clashscore                         | 4.2                    |

Values in parentheses refer to the high-resolution shell.

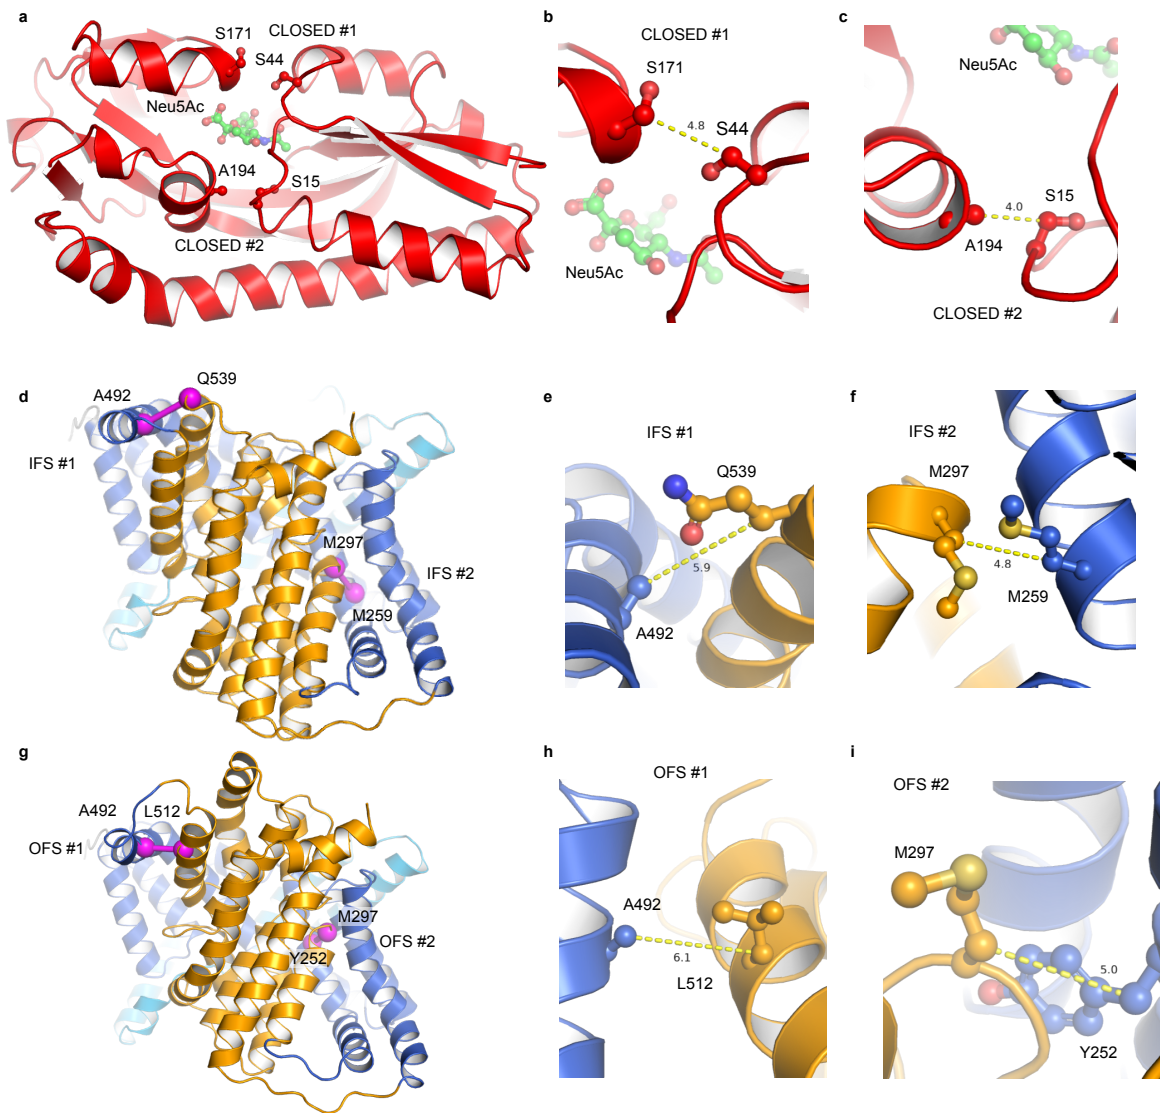

**Supplementary Fig. 1 | Design of disulfide linked constructs for HiSiaP and HiSiaQM.** **a)** Cartoon representation of HiSiaP with Neu5Ac as green sticks and the positions that were mutated to cysteines in CLOSED #1/2 shown as sticks. **b)** Close-up of the CLOSED #1 site. **c)** Close-up of the CLOSED #2 site. **d)** Structure of HiSiaQM in the IFS shown as cartoon model with the positions that were mutated to cysteines shown as magenta spheres. **e,f)** Close-up of the IFS#1/2 sites. **g)** Model of HiSiaQM in the OFS shown as cartoon model with the positions that were mutated to cysteines shown as magenta spheres. **h,i)** Close-up of the OFS#1/2 sites. IFS: inward-facing state; OFS: outward-facing state.

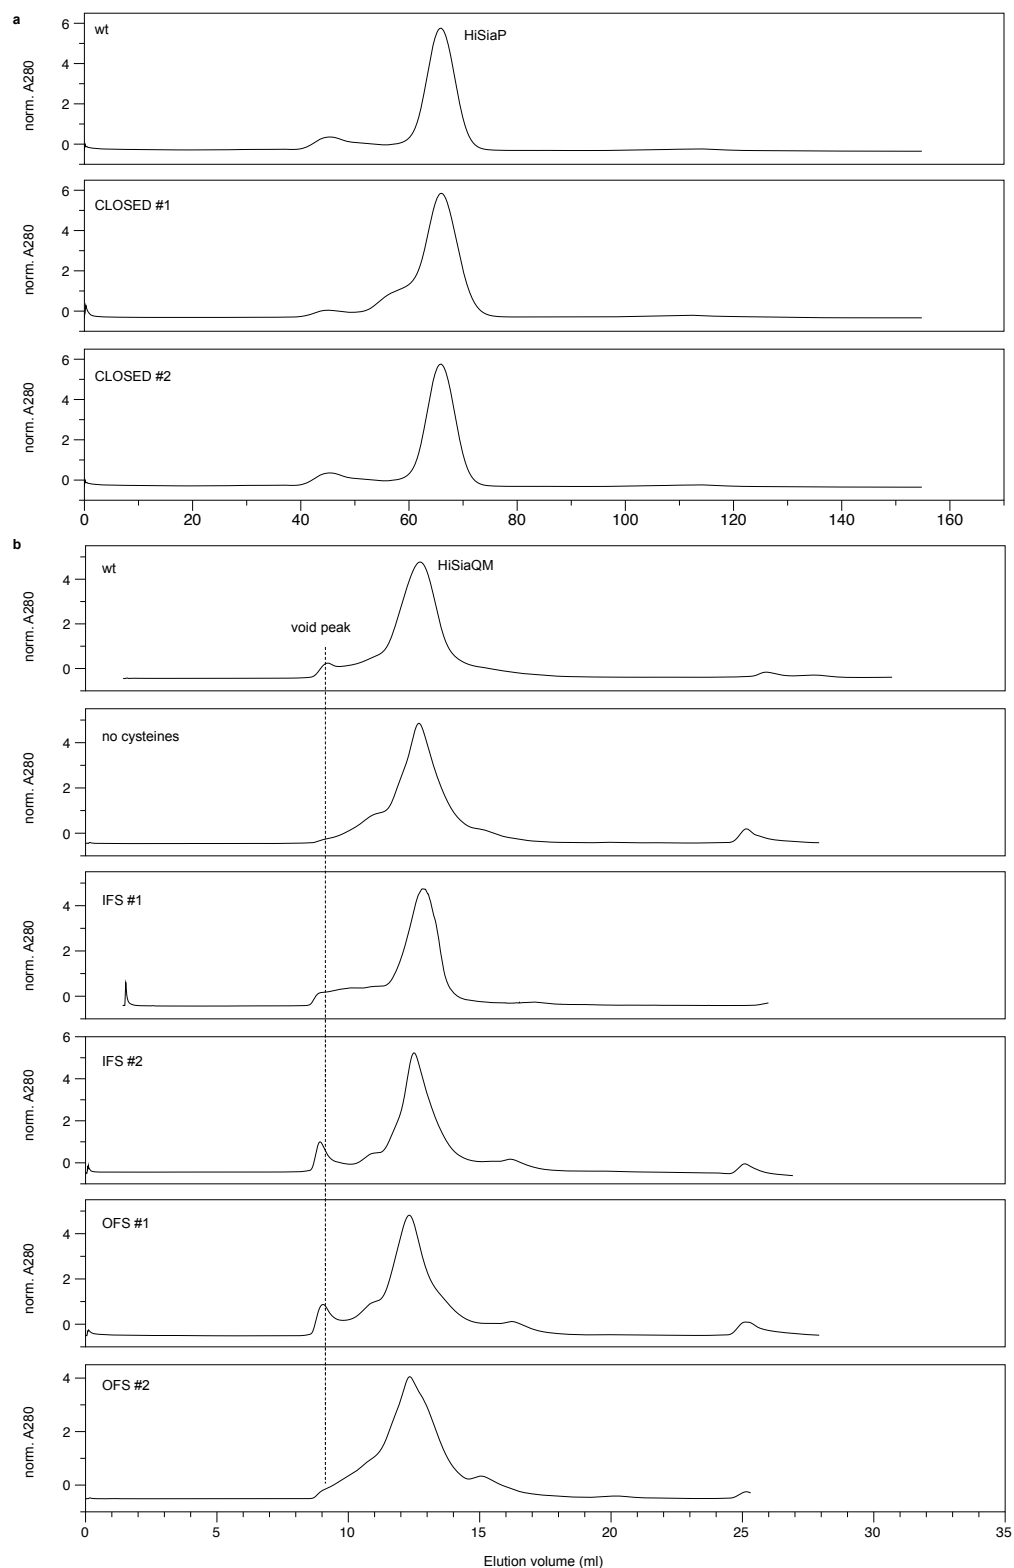

**Supplementary Fig. 2 | Gelfiltration runs of the different HiSiaP and HiSiaQM constructs used in this study. a)** All HiSiaP gelfiltrations were performed on a Superdex 75 16/600 column. **b)** All HiSiaQM gelfiltrations were performed on Superdex 200 10/300 columns but on different FPLC systems. Therefore, the runs were aligned on the void peak for easier comparison. FPLC: Fast protein liquid chromatography. Source data are provided as a Source Data file.

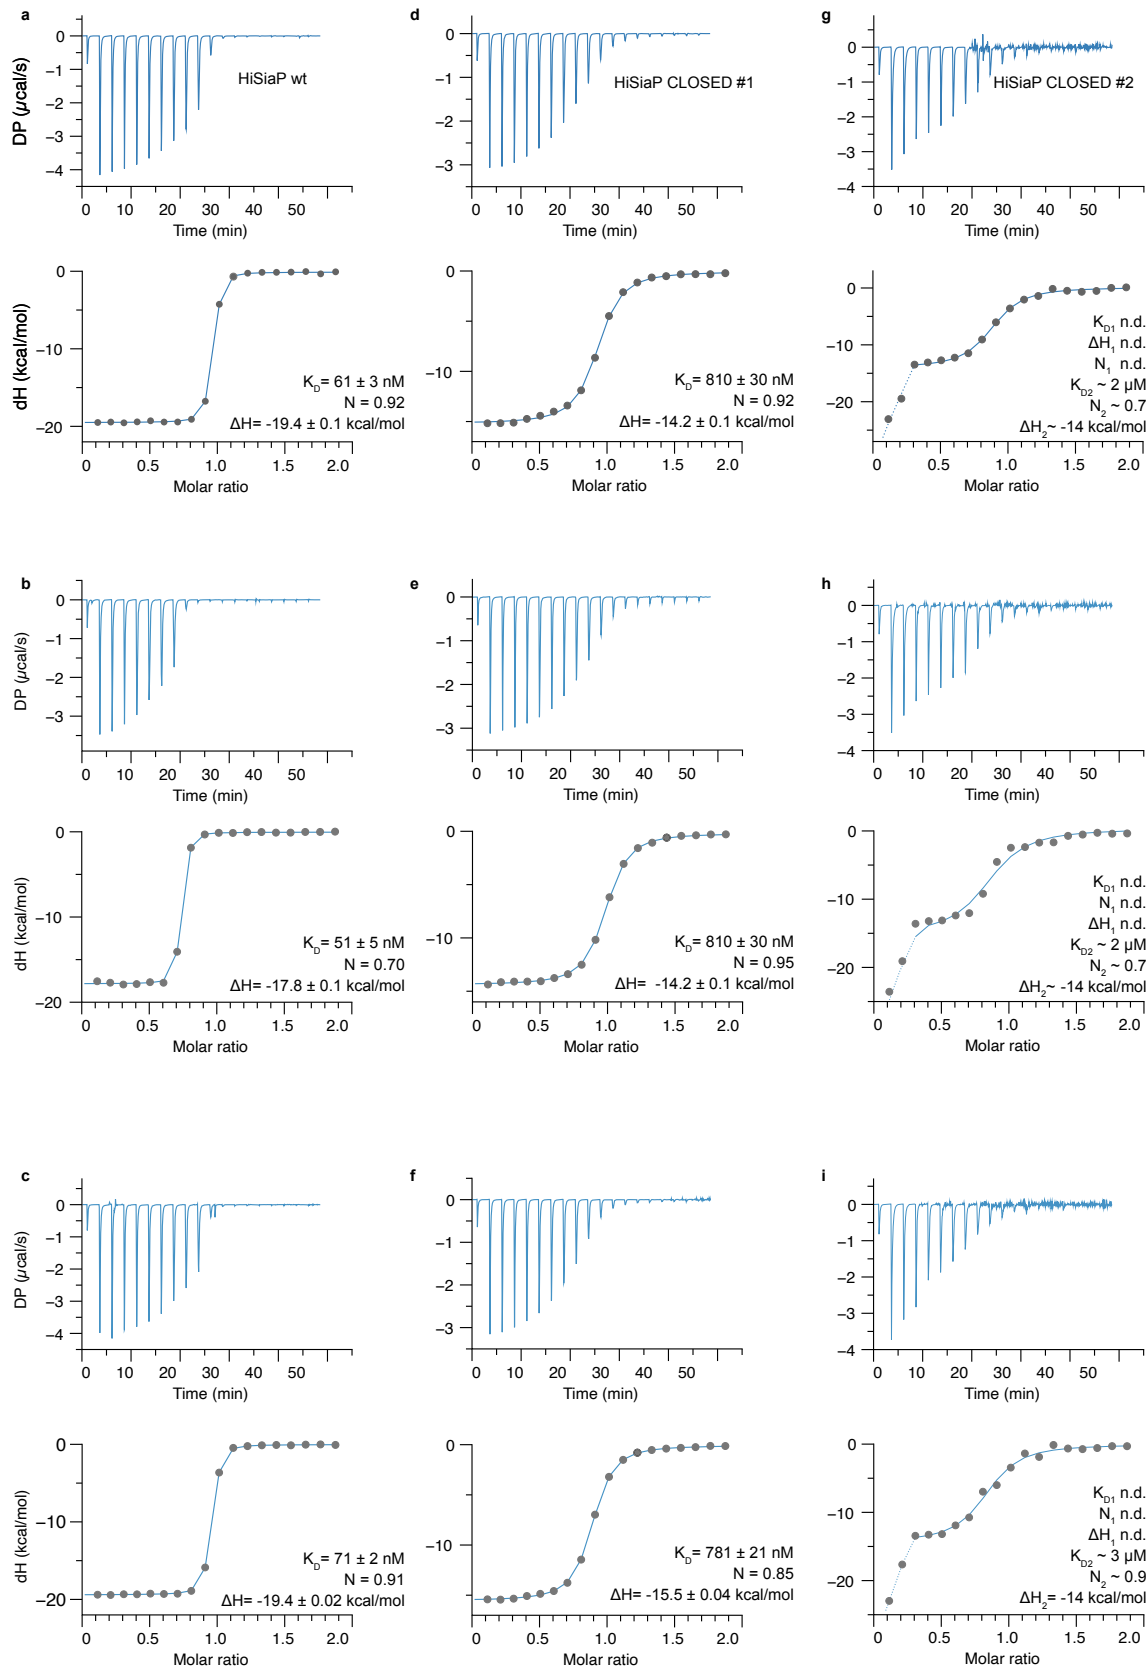

**Supplementary Fig. 3 | Isothermal titration calorimetry runs for the indicated HiSiaP constructs.** In each panel, the raw data are shown on the top and the integrated heat signals, as well as the thermodynamic parameters at the bottom. Source data are provided as a Source Data file.

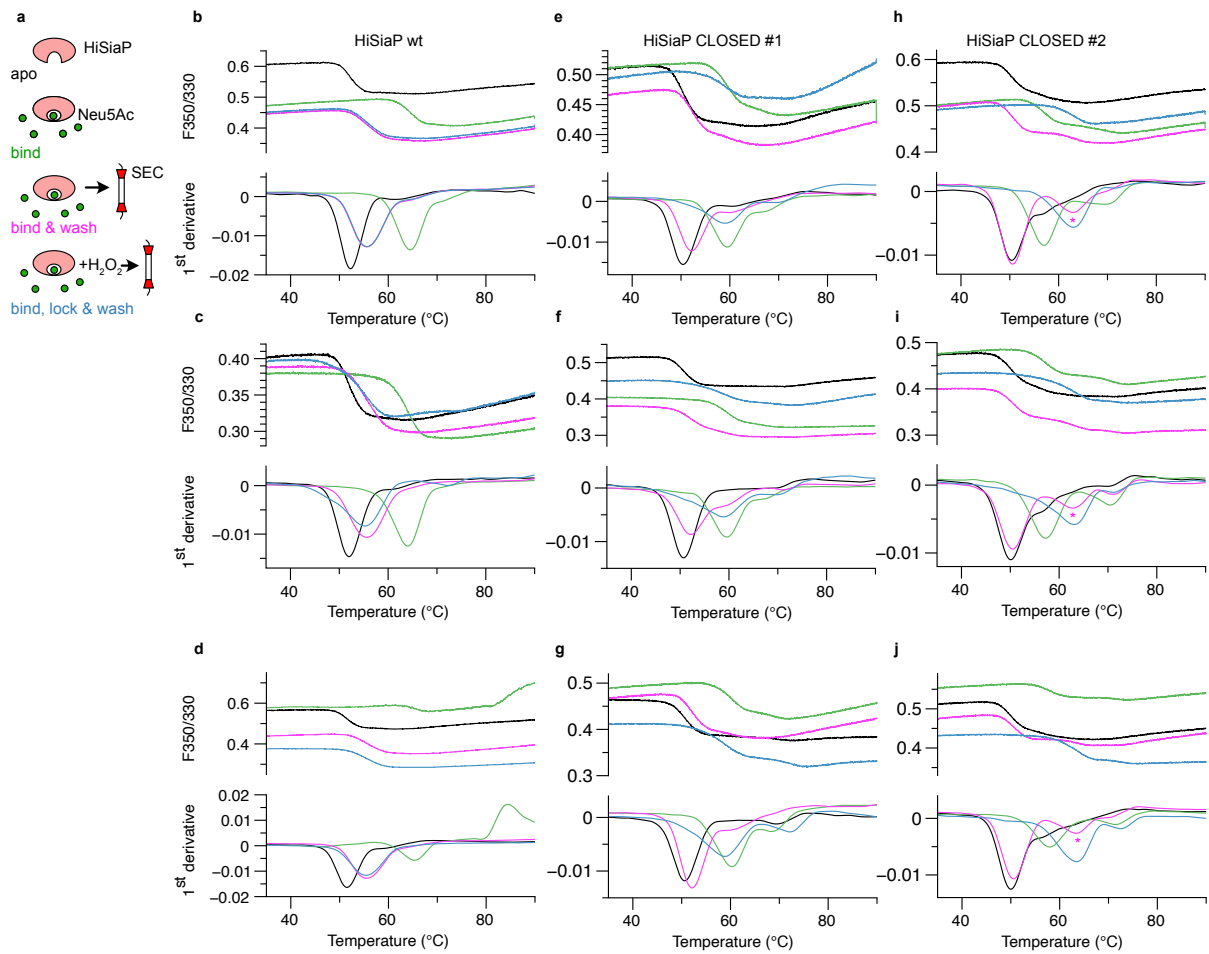

**Supplementary Fig. 4 | NanoDSF Experiments on the HiSiaP constructs used in this study.** **a)** Schematic as in Fig. 2, explaining the setup of the different experiments and the color code of the traces in panels b-j. **b)** NanoDSF runs with raw data shown on the top and the 1<sup>st</sup> derivative of each trace shown on the bottom. The color code is explained in panel a). The magenta asterisks in panels h-j) correspond to the magenta asterisk in Fig. 2b and mark the position of the distinct second peak in the 1<sup>st</sup> derivative of the “bind & wash” experiment for HiSiaP CLOSED #2. DSF: Differential scanning fluorimetry. Source data are provided as a Source Data file.

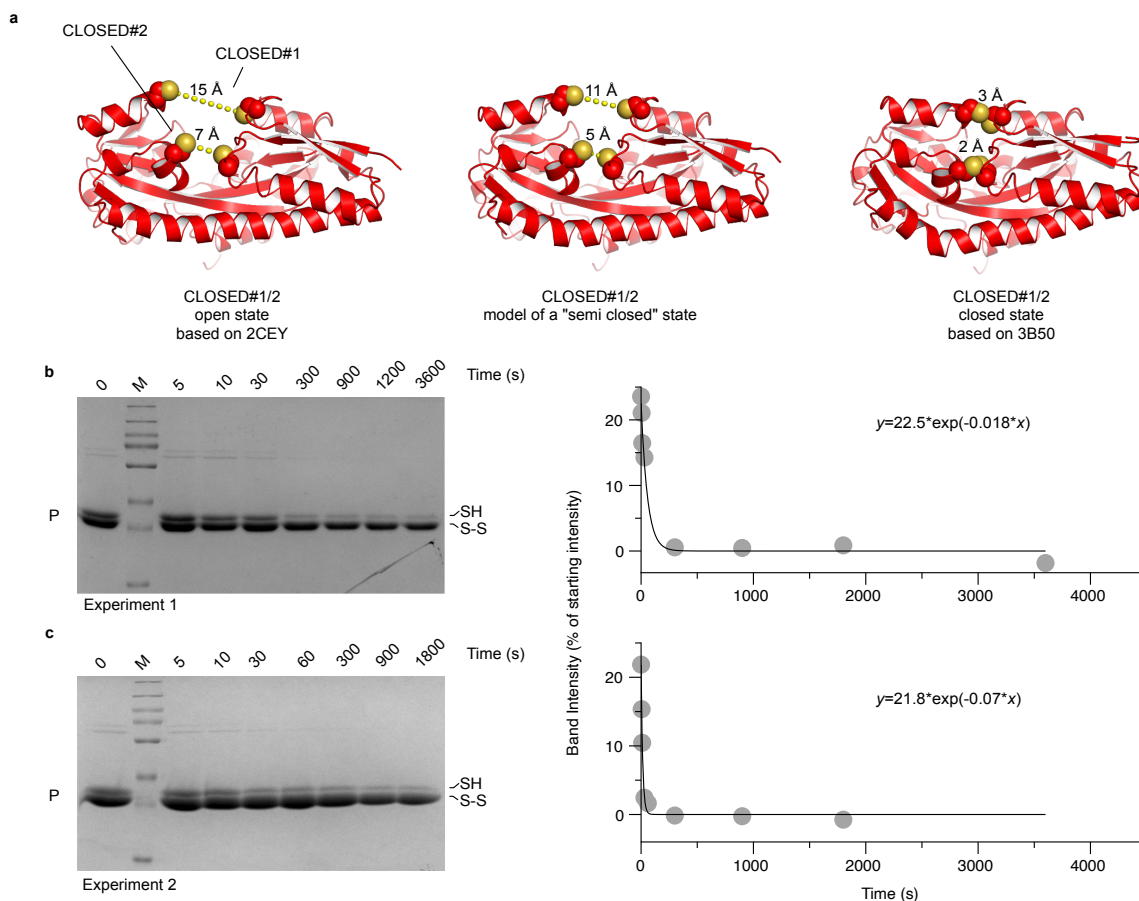

**Supplementary Fig. 5 | Trapping rare closing events of apo HiSiaP.** **a)** The cartoon models show HiSiaP in its open (left), closed (right) and a modelled semi-closed state (middle). The model was produced using Rigimol ([www.pymol.org](http://www.pymol.org)). The engineered cysteine residues are shown as spheres and the distances between the  $S_{\gamma}$  atoms are shown as dotted yellow lines. In this model, due to its position with respect to the hinge of the closing motion, the CLOSED #2 cysteines can form a disulfide bond, when the CLOSED #1 cysteines are still too far apart. **b, c)** left: Two ( $n = 2$ ) independent time course experiments of apo HiSiaP CLOSED #2 forming a disulfide link in the presence of copper phenantroline. right: The intensities of the bands on the left were quantified and plotted as a percentage of the initial intensity of the upper band, i.e. of the non-crosslinked fraction of HiSiaP (grey circles). The intensities could be fitted with a mono exponential decay function. The fitting equation is given for each experiment. Uncropped version of the two gels are shown in Supplementary Fig. 10. Source data are provided as a Source Data file.



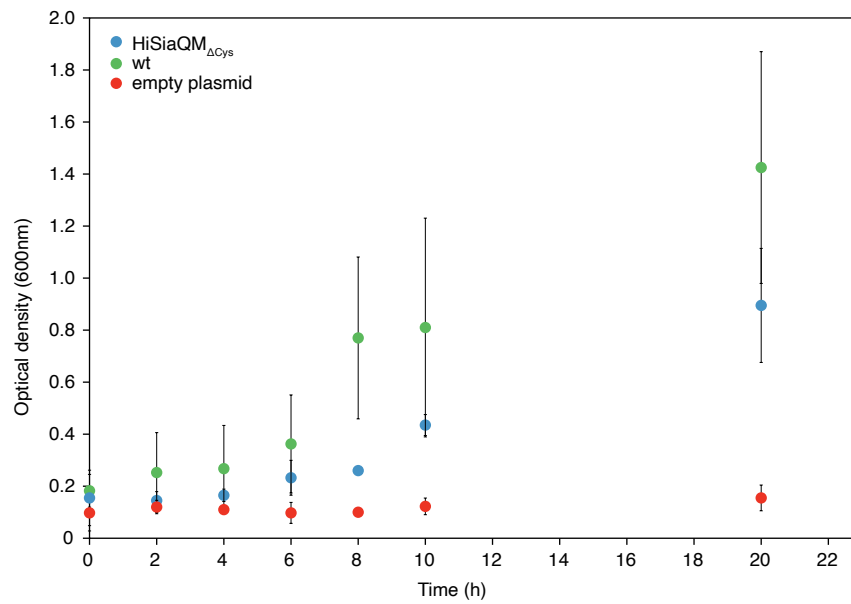

**Supplementary Fig. 6 | A sialic acid uptake assay as in SEVY3-based complementation assay** <sup>14,24,25</sup>. Briefly, *E. coli* cells without a functioning sialic acid uptake system were supplemented with either wild-type HiSiaPQM, the HiSiaPQM $\Delta$ Cys mutant or an empty plasmid. Growth of these bacteria was monitored in minimal media with sialic acid as the sole source of carbon and energy. Data of n=3 independent experiments are presented as mean values (colored circles) +/- standard deviation (error bars). Source data are provided as a Source Data file.

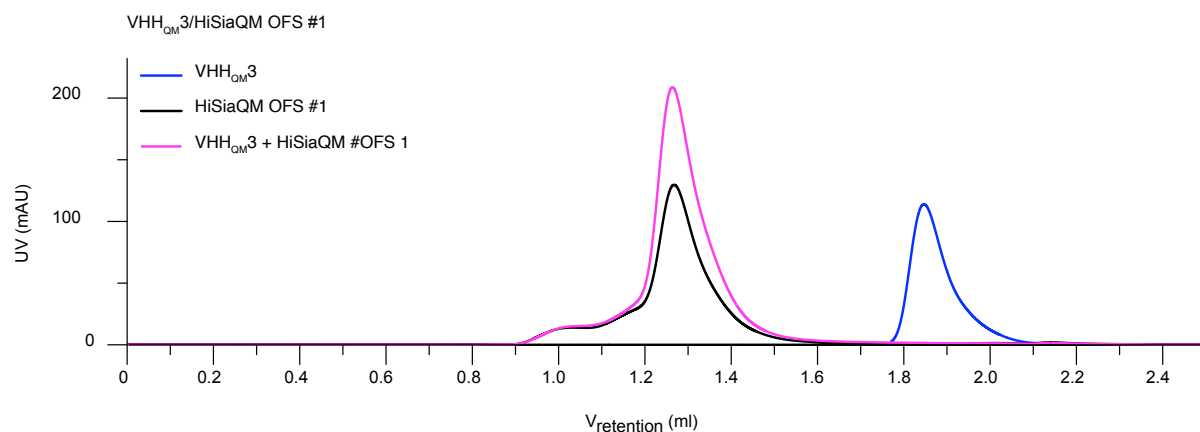

**Supplementary Fig. 7 | HiSiaQM OFS#1 in detergent binds VHHQM 3.** Three gel filtration experiments (Superose increase 6 3.2/300) with equal amounts of either VHH<sub>QM</sub> 3 (blue), HiSiaQM OFS#1 (black) or a mix of both components (magenta). The experiment shows that in DDM detergent, VHHQM 3 (blue curve) binds to HiSiaQM OFS#1. OFS: outward-facing state. Source data are provided as a Source Data file.

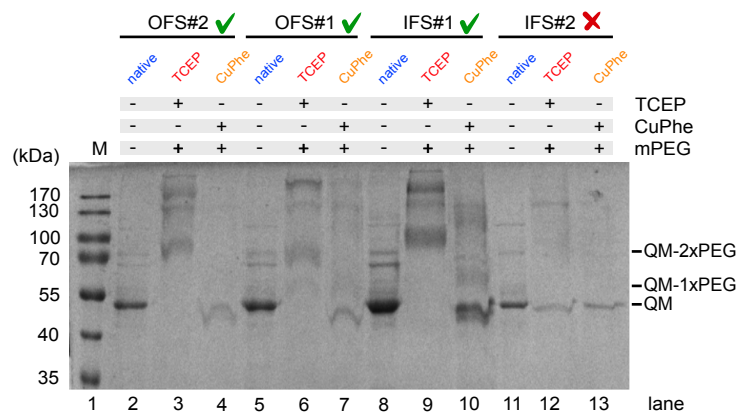

**Supplementary Fig. 8** | Example of the PEGylation experiment as described in Fig. 4f. Results that met our expectations are marked with a green checkmark. Validation results that did not meet our expectations are marked with a red cross. An uncropped version of this gel is shown in Supplementary Fig. 10. PEG: polyethylene glycol.

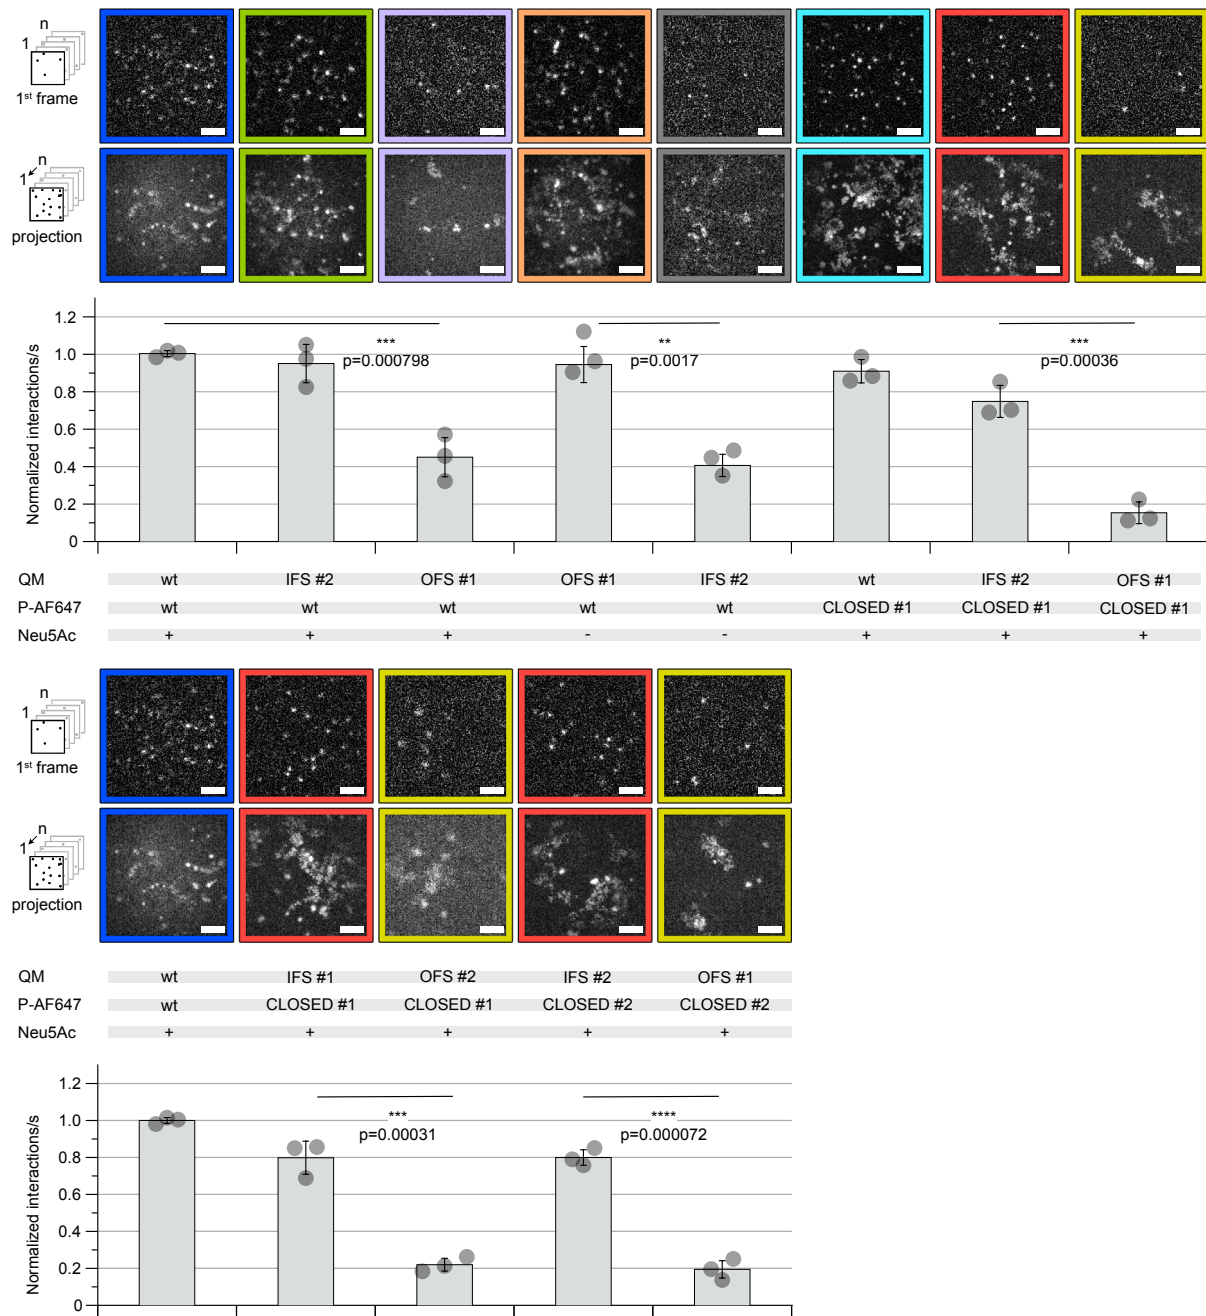

**Supplementary Fig. 9 | Single molecule TIRF microscopy of trapped TRAP transporter domains.** a-l) Top: first frame of an image sequence of a typical set of data and the corresponding maximum intensity projection of the respective image sequence. Bottom: Normalized interactions per second between AF647 labelled HiSiaP constructs and the indicated HiSiaQM constructs. The statistical significance of differences between selected experiments was assessed by applying a two-sided unpaired Student's t-test with a 95% confidence interval. The scale bars equal 3  $\mu\text{m}$ . A movie with all conditions can be found in the supplementary information (Supplementary Movie 1). TIRF: total internal reflection. Source data are provided as a Source Data file.

Fig. 2d

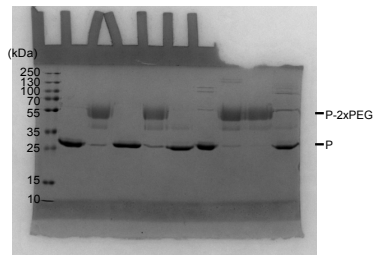

Fig. 2e

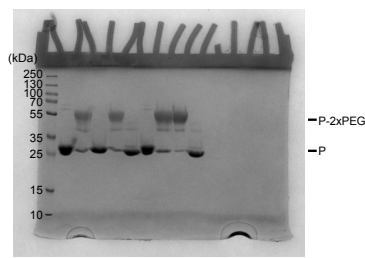

Fig. 4g

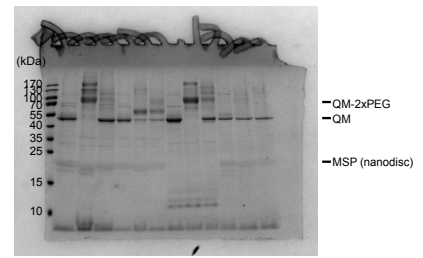

Supplementary Fig. 8

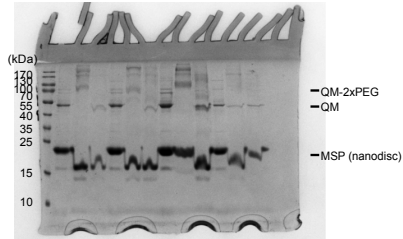

Supplementary Fig. 5b

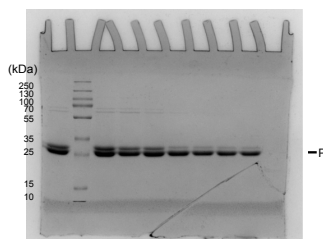

Supplementary Fig. 5c

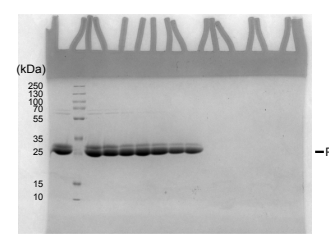

**Supplementary Fig. 10 | Uncropped versions of the gels throughout the manuscript. In each panel the Figure with the cropped version of the gel is indicated.**
