# Supplementary material for: Conformational coupling of the sialic acid TRAP transporter HiSiaQM with its substrate binding protein HiSiaP
Source: PubMed Central journal article supplement (PMC10774421; doi:10.1038/s41467-023-44327-3), 2024-01-08
Supplement: 41467_2023_44327_MOESM3_ESM.pdf [file 41467_2023_44327_MOESM3_ESM.pdf]

Title: Supplementary Movie 1:

Description: Compilation of movies for the TIRF experiments in Fig. 6 and Supplementary Fig. 9. The white scale bar corresponds to 3  $\mu\text{m}$  and is valid for all movies. TIRF: total internal reflection.

Title: Supplementary Movie 2:

Description: Movies for the TIRF experiments in Fig. 5. The white scale bar corresponds to 3  $\mu\text{m}$  and is valid for all movies. TIRF: total internal reflection
